# Supplementary material for: Relaxation enhancement by microwave irradiation may limit dynamic nuclear polarization
Source: Royal Society of Chemistry journal article supplement (doi:10.1039/d3cp06025j), 2024-01-01

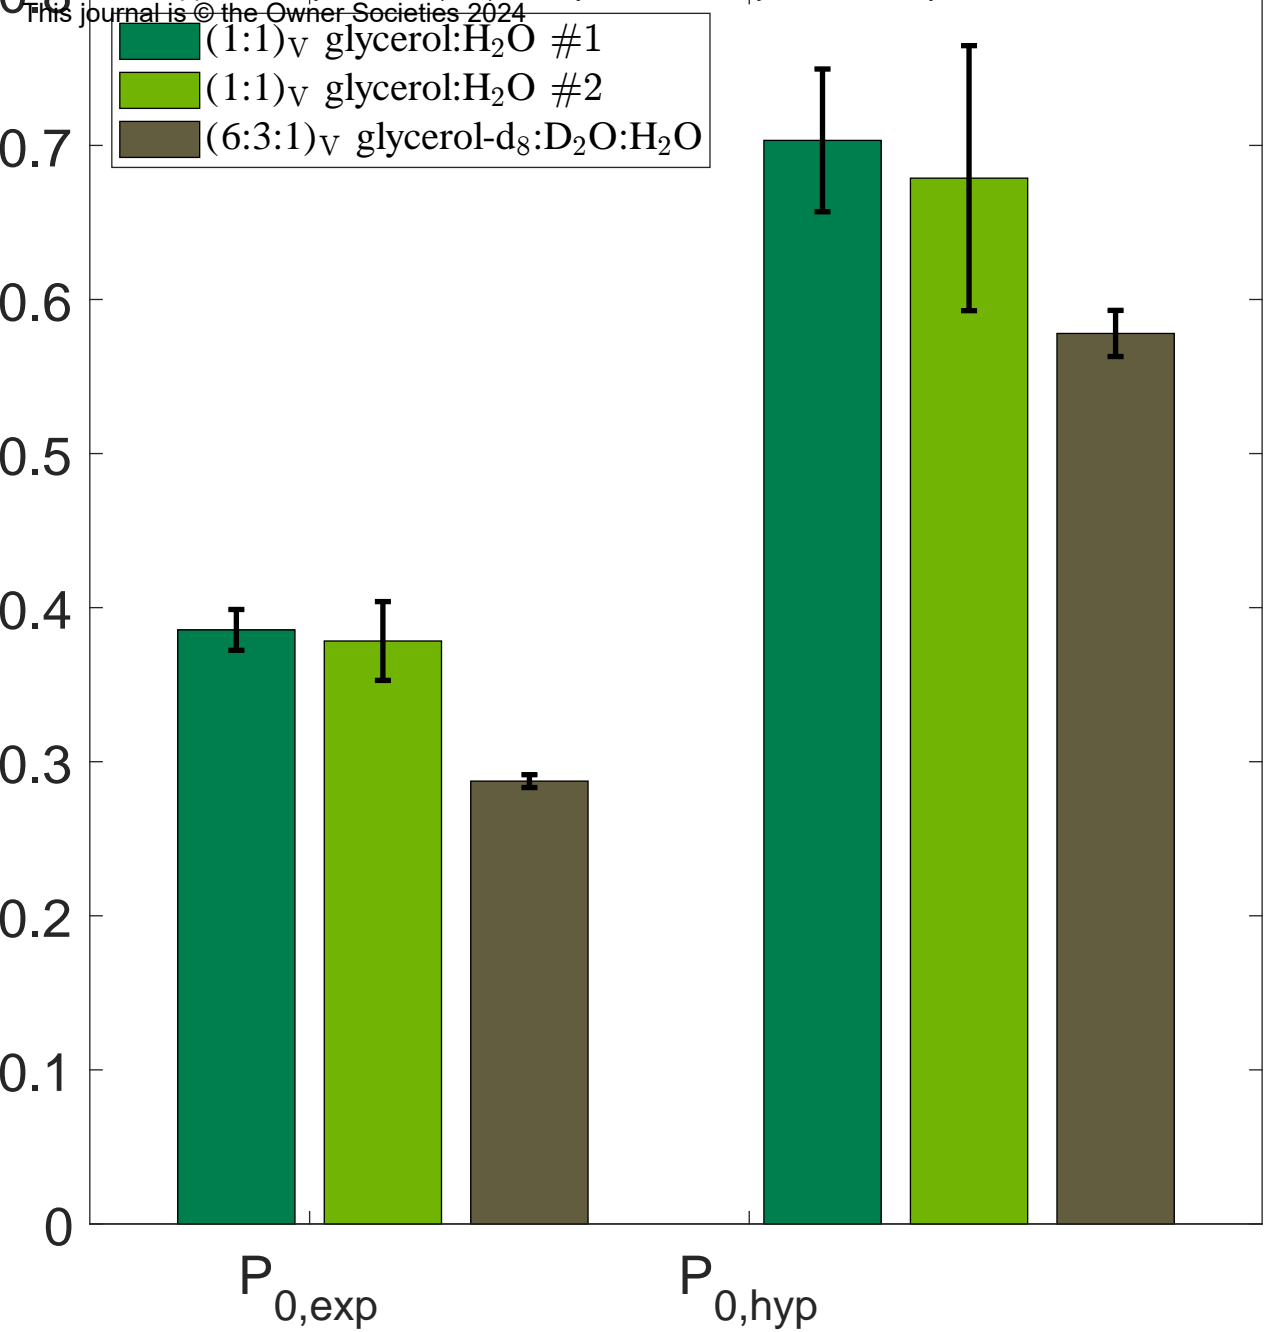

Supplement: d3cp06025j4.pdf [file d3cp06025j4.pdf]
